# Supplementary material for: Unfolded protein response in Gaucher disease: from human to Drosophila
Source: PubMed Central journal article supplement (PMC3819655; doi:10.1186/1750-1172-8-140), 2013-09-11

**Supplementary Figure 1.**

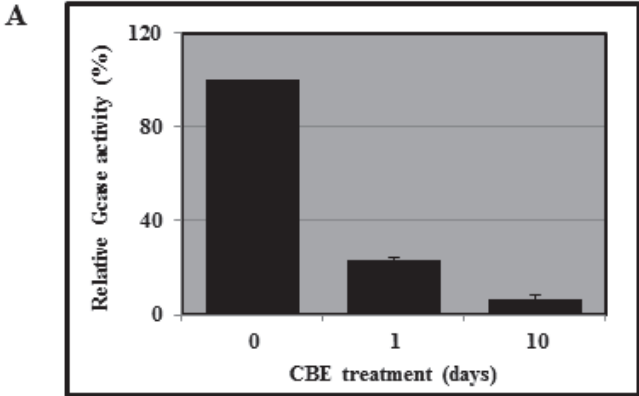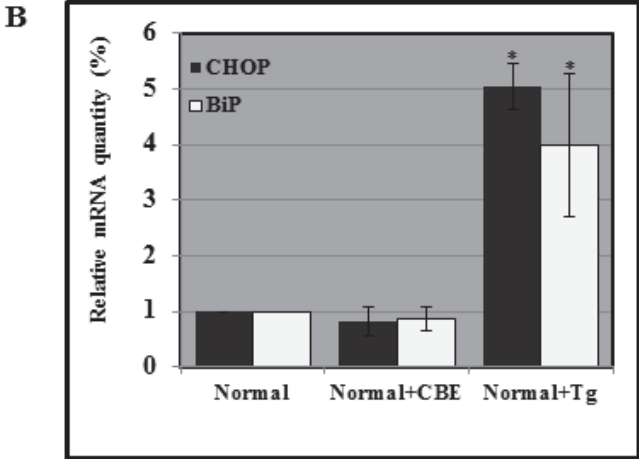

Supplement: 1750-1172-8-140-S1.pdf [file 1750-1172-8-140-S1.pdf]
